# Supplementary material for: The Association of Type 2 Diabetes Mellitus with Cerebral Gray Matter Volume Is Independent of Retinal Vascular Architecture and Retinopathy
Source: Hindawi journal article supplement (doi:10.1155/2016/6328953), 2016-01-01
Supplement: f1 [file 6328953.f1.pdf]

Supplementary Table 1 Mean retinal measures\*

|                                       | T2DM<br>Mean (SD) | No T2DM<br>Mean (SD) | P value |
|---------------------------------------|-------------------|----------------------|---------|
|                                       | 270               | 181                  |         |
| <b>Arteriolar measures</b>            |                   |                      |         |
| Arteriolar length, pixels             | 651 (264)         | 637 (274)            | 0.58    |
| Arteriolar diameter, pixels           | 24.3 (2.3)        | 23.8 (2.2)           | 0.03    |
| Length/diameter ratio                 | 27.0 (11.3)       | 27.0 (12)            | 0.95    |
| Simple tortuosity <sup>†</sup>        | 0.051 (0.04)      | 0.044 (0.04)         | 0.10    |
| Internal Angle, °                     | 75.5 (18.2)       | 72.6 (14.6)          | 0.08    |
| Optimality ratio                      | 0.83 (0.06)       | 0.82 (0.06)          | 0.04    |
| <b>Venous Measures</b>                |                   |                      |         |
| Venous length, pixels                 | 508 (180)         | 504 (202)            | 0.83    |
| Venous diameter, pixels               | 29.4 (3.7)        | 29.3 (3.7)           | 0.81    |
| Venous length/diameter ratio          | 17.7 (6.8)        | 17.5 (7.2)           | 0.79    |
| Venous simple tortuosity <sup>†</sup> | 0.021 (0.01)      | 0.020 (0.01)         | 0.24    |

T2DM: Type 2 diabetes; SD: Standard Deviation

\*Including non-symmetrical second order vessels for all bifurcations.

<sup>†</sup> Mann-Whitney U test

Supplementary Table 2. Descriptive characteristics of retinopathy changes

|                           | T2DM<br>N(%)<br>n=283 | No T2DM<br>N(%)<br>n=187 | p value |
|---------------------------|-----------------------|--------------------------|---------|
| Disc disease              | 8 (3)                 | 11 (6)                   | 0.10    |
| Copper/silver wiring      | 47 (17)               | 16 (9)                   | 0.01    |
| Generalised narrowing     | 31 (11)               | 34 (18)                  | 0.03    |
| Focal narrowing           | 4 (1)                 | 13 (7)                   | 0.002   |
| A-V crossing              | 17 (6)                | 24 (13)                  | 0.01    |
| Microaneurysm *           | 22 (8)                | 1 (1)                    | <0.001  |
| Venous diameter change    | 5 (2)                 | 1 (1)                    | 0.24    |
| Intraretinal haemorrhage  | 25 (9)                | 2 (1)                    | <0.001  |
| Nerve fibre haemorrhage * | 10 (4)                | 3 (2)                    | 0.21    |
| Hard exudate              | 10 (4)                | 0                        | 0.009   |
| New vessel formation *    | 0                     | 0                        |         |
| IRMA <sup>a</sup>         | 0                     | 0                        |         |
| Cotton wool spot *        | 3 (1)                 | 2 (2)                    | 0.99    |
| Macular degeneration      | 8 (3)                 | 16 (9)                   | 0.006   |
| Photocoagulation          | 11 (4)                | 0                        | 0.006   |
| Treatment *               |                       |                          |         |
| Diabetic retinopathy *    | 33 (12)               | 7 (4)                    | 0.003   |
| Any retinopathy           | 106 (37)              | 70 (37)                  | 1.0     |

A-V- Arteriovenous crossing; IRMA – intraretinal microvascular abnormalities; NA – not applicable

\* Retinopathy changes used to classify diabetes-related retinopathy using a simplified version of the Wisconsin grading system (25)

Supplementary Table 3 Associations between retinal measurements and brain measurements

| Retinal variable           | Gray matter volume (ml)<br>β (95% CI)    | Total hippocampal volume (ml)<br>β (95% CI) | White matter volume (ml)<br>β (95% CI) | WMH volume (ml)<br>β (95% CI) | Infarct present*<br>β (95% CI)             | Microbleed present*<br>β (95% CI) |
|----------------------------|------------------------------------------|---------------------------------------------|----------------------------------------|-------------------------------|--------------------------------------------|-----------------------------------|
| <b>Arteriolar measures</b> |                                          |                                             |                                        |                               |                                            |                                   |
| Length                     |                                          |                                             |                                        |                               |                                            |                                   |
| WG                         | 0.002(-0.003-0.006)                      | -0.0002(-0.0004-0.00001)                    | 0.002(-0.002 to 0.006)                 | 0.0002(-0.002 to 0.003)       | -0.0003 (-0.001 to 0.001)                  | -0.001(-0.003 to 0.001)           |
| T2DM                       | 0.002 (-0.003-0.008)                     | -0.0001(-0.0004-0.0002)                     | 0.004 (-0.002-0.01)                    | 0.0005(-0.002-0.003)          | -0.001(-0.002-0.0004)                      | -0.002(-0.005-0.001)              |
| No T2DM                    | 0.002 (-0.005-0.080)                     | -0.0002(-0.001-0.0001)                      | -0.001 (-0.01 -0.01)                   | -0.0003(-0.004-0.004)         | 0.0004(-0.001-0.002)                       | -0.001(-0.003-0.002)              |
| Diameter                   |                                          |                                             |                                        |                               |                                            |                                   |
| WG                         | 0.10(-0.42 to 0.62)                      | 0.004 (-0.03 to 0.03)                       | -0.22(-0.74 to 0.31)                   | 0.006(-0.27 to 0.28)          | -0.07(-0.19 to 0.05)                       | -0.12(-0.33 to 0.10)              |
| T2DM                       | 0.49 (-0.18 to 1.17)                     | 0.005 (-0.03 to 0.04)                       | -0.20 (-0.88 to 0.47)                  | -0.06 (-0.39 to 0.26)         | -0.10 (-0.24 to 0.05)                      | -0.30 (-0.65 to 0.05)             |
| No T2DM                    | -0.31 (-1.12 to 0.51)                    | -0.005 (-0.04 to 0.04)                      | -0.26 (-1.11 to 0.58)                  | 0.11 (-0.38 to 0.61)          | -0.10 (-0.31 to 0.12)                      | 0.05 (-0.23 to 0.33)              |
| LDR                        |                                          |                                             |                                        |                               |                                            |                                   |
| WG                         | 0.04(-0.06 to 0.14)                      | -0.004 (-0.01 to 0.001)                     | 0.05(-0.05 to 0.16)                    | -0.003(-0.06 to 0.05)         | -0.01(-0.03 to 0.02)                       | -0.02(-0.06 to 0.02)              |
| T2DM                       | 0.04 (-0.09 to 0.18)                     | -0.004 (-0.01 to 0.003)                     | 0.09 (-0.04 to 0.22)                   | 0.005 (-0.06 to 0.07)         | -0.02 (-0.04 to 0.01)                      | -0.02 (-0.09 to 0.05)             |
| No T2DM                    | 0.04 (-0.11 to 0.20)                     | -0.005 (-0.01 to 0.003)                     | -0.005 (-0.17 to 0.16)                 | -0.02 (-0.11 to 0.08)         | 0.01 (-0.03 to 0.05)                       | -0.02 (-0.07 to 0.04)             |
| Simple tortuosity          |                                          |                                             |                                        |                               |                                            |                                   |
| WG                         | 4.28(-24.77 to 33.32)                    | -0.58 (-2.06 to 0.89)                       | 2.75(-26.29 to 31.80)                  | 1.55(-13.61 to 16.70)         | -1.04(-7.49 to 5.42)                       | 2.42(-8.53 to 13.37)              |
| T2DM                       | 3.39 (-32.73 to 39.51)                   | -1.12 (-3.00 to 0.76)                       | 6.16 (-29.92 to 42.24)                 | -0.07 (-17.59 to 17.44)       | -1.26 (-9.00 to 6.47)                      | 1.65 (-14.72 to 18.02)            |
| No T2DM                    | 17.33 (-32.06 to 66.71)                  | -0.04 (-2.48 to 2.41)                       | -15.51 (-66.14 to 35.12)               | 1.86 (-27.83 to 31.54)        | -1.14 (-14.21 to 11.94)                    | 5.88 (-9.54 to 21.29)             |
| Internal Angle             |                                          |                                             |                                        |                               |                                            |                                   |
| WG                         | -0.05(-0.12 to 0.02)                     | -0.0001 (-0.004 to 0.003)                   | 0.05(-0.02 to 0.12)                    | -0.01(-0.05 to 0.02)          | 0.003(-0.01 to 0.02)                       | -0.02(-0.05 to 0.01)              |
| T2DM                       | -0.05 (-0.13 to 0.03)                    | -0.001 (-0.006 to 0.003)                    | 0.06 (-0.02 to 0.14)                   | -0.01 (-0.05 to 0.03)         | 0.002 (-0.01 to 0.02)                      | -0.01 (-0.05 to 0.03)             |
| No T2DM                    | -0.03 (-0.16 to 0.11)                    | 0.002 (-0.004 to 0.008)                     | -0.01 (-0.15 to 0.13)                  | -0.01 (-0.09 to 0.07)         | -0.004 (-0.04 to 0.03)                     | -0.02 (-0.07 to 0.03)             |
| Optimality Ratio           |                                          |                                             |                                        |                               |                                            |                                   |
| WG                         | <b>-22.15(-41.69- -2.61)<sup>†</sup></b> | -0.54(-1.52 to 0.45)                        | 13.97(-5.63 to 33.56)                  | 3.70(-13.95 to 6.54)          | <b>-4.97(-9.62 to -0.33)<sup>†</sup></b>   | -5.52(-14.10 to 3.07)             |
| T2DM                       | -17.63 (-43.87 to 8.61)                  | -0.03 (-1.38 to 1.33)                       | 7.75 (-18.25 to 33.76)                 | -0.88 (-13.48 to 11.71)       | <b>-6.57 (-12.56 to -0.58)<sup>†</sup></b> | -5.31 (-17.62 to 7.00)            |
| No T2DM                    | -26.00 (-54.94 to 2.95)                  | -1.30 (-2.71 to 0.10)                       | 20.86 (-9.10 to 50.83)                 | -7.77 (-25.41 to 9.87)        | -3.79 (-11.95 to 4.38)                     | -5.21 (-17.07 to 6.65)            |

| Venular measures     |         |                          |                             |                           |                           |                          |                           |
|----------------------|---------|--------------------------|-----------------------------|---------------------------|---------------------------|--------------------------|---------------------------|
| Length               | WG      | -0.001(-0.008-0.005)     | -0.0001(-0.0004 to 0.0002)  | -0.006(-0.01 to 0.0001)   | 0.001(-0.002 to 0.004)    | 0.0003(-0.001 to 0.002)  | -0.002(-0.005 to 0.001)   |
|                      | T2DM    | 0.001 (-0.01 to 0.01)    | -0.0002 (-0.001 to 0.0003)  | -0.006 (-0.01 to 0.002)   | -0.0005 (-0.005 to 0.004) | 0.001 (-0.001 to 0.002)  | 0.001 (-0.003 to 0.004)   |
|                      | No T2DM | -0.003 (-0.01 to 0.01)   | -0.00004(-0.0005 to 0.0004) | -0.005 (-0.01 to 0.005)   | 0.002 (-0.003 to 0.008)   | -0.001 (-0.003 to 0.002) | -0.004 (-0.01 to 0.001)   |
| Diameter             | WG      | 0.29(-0.03 to 0.60)      | 0.001(-0.01 to 0.02)        | 0.004(-0.31 to 0.32)      | -0.04(-0.21 to 0.12)      | 0.96 (0.89 to 1.03)      | 1.02(0.90 to 1.15)        |
|                      | T2DM    | 0.36 (-0.04 to 0.76)     | -0.001 (-0.02 to 0.02)      | -0.10 (-0.50 to 0.30)     | -0.16 (-0.35 to 0.04)     | 0.95 (0.88 to 1.04)      | 0.99 (0.82 to 1.19)       |
|                      | No T2DM | 0.10 (-0.40 to 0.61)     | 0.01 (-0.02 to 0.03)        | 0.20 (-0.32 to 0.72)      | 0.15 (-0.15 to 0.45)      | 0.96 (0.84 to 1.10)      | 1.03 (0.88 to 1.21)       |
| LDR                  | WG      | -0.08(-0.25 to 0.09)     | -0.003(-0.01 to 0.006)      | -0.13(-0.30 to 0.04)      | 0.03(-0.06 to 0.12)       | 0.02(-0.02 to 0.05)      | -0.04(-0.12 to 0.03)      |
|                      | T2DM    | -0.04 (-0.26 to 0.18)    | -0.005 (-0.02 to 0.01)      | -0.11 (-0.33 to 0.11)     | 0.03 (-0.08 to 0.14)      | 0.03 (-0.01 to 0.07)     | 0.02 (-0.07 to 0.11)      |
|                      | No T2DM | -0.08 (-0.34 to 0.18)    | -0.002 (-0.02 to 0.01)      | -0.18 (-0.44 to 0.09)     | 0.03 (-0.12 to 0.18)      | -0.02 (-0.09 to 0.05)    | -0.11 (-0.24 to 0.01)     |
| Simple tortuosity    | WG      | -25.58(-114.88 to 63.72) | -0.53(-5.14 to 4.08)        | -51.25(-140.99 to 38.49)  | 19.73(-28.64 to 64.51)    | 8.98(-10.32 to 28.28)    | -23.50(-66.46 to 19.45)   |
|                      | T2DM    | 18.58 (-98.88 to 136.0)  | -1.63 (-7.87 to 4.61)       | -26.16 (-143.66 to 91.34) | 37.00 (-20.10 to 94.10)   | 12.92 (-11.31 to 37.15)  | -1.93 (-56.08 to 52.23)   |
|                      | No T2DM | -58.92(-197.13to 79.3)   | -0.15 (-7.07 to 6.77)       | -106.9 (-248.80 to 35.00) | -13.00 (-94.69 to 68.71)  | -4.47 (-43.23 to 34.29)  | -50.56 (-129.74 to 28.62) |
| Diabetic retinopathy | T2DM    | 0.30 (-4.44 to 5.04)     | 0.25 (-0.22 to 0.27)        | -3.00 (-7.55 to 1.54)     | -0.14 (-2.54 to 2.26)     | 0.43 (-0.48 to 1.34)     | 0.65 (-1.00 to 2.30)      |

LDR: length/diameter ratio; WG: whole group combined; T2DM: Type 2 diabetes; WMH: White matter hyperintensity

Model 1, adjusted for age, sex and intra-cranial volume

\* Not adjusted for history of stroke or intra-cranial volume

† p value < 0.05
